# Supplementary material for: Higher Health Service Costs Associated With Delayed Diagnosis of Functional Neurological Disorder
Source: Atypon-hosted journal article supplement (doi:10.1176/appi.neuropsych.21110288), 2022-08-22
Supplement: appi.neuropsych.21110288.ds001.pdf [file appi.neuropsych.21110288.ds001.pdf]

### Customized structured assessment used in the study

|                                                                                                                                                                                                                                                                                                                                                          |                                                                                |             |
|----------------------------------------------------------------------------------------------------------------------------------------------------------------------------------------------------------------------------------------------------------------------------------------------------------------------------------------------------------|--------------------------------------------------------------------------------|-------------|
| <b>Study code:</b>                                                                                                                                                                                                                                                                                                                                       | <b>Sex:</b>                                                                    | <b>Age:</b> |
| <b>Onset (months):</b>                                                                                                                                                                                                                                                                                                                                   |                                                                                |             |
| <b>Referral:</b>                                                                                                                                                                                                                                                                                                                                         | <ul style="list-style-type: none"> <li>• Urgent</li> <li>• Elective</li> </ul> |             |
| <b>Mode of presentation (by history):</b>                                                                                                                                                                                                                                                                                                                |                                                                                |             |
| <ul style="list-style-type: none"> <li>• Acute/subacute</li> <li>• Chronic</li> </ul>                                                                                                                                                                                                                                                                    |                                                                                |             |
| <b>Presence of a trigger (self-reported on specific questioning):</b>                                                                                                                                                                                                                                                                                    |                                                                                |             |
| <ul style="list-style-type: none"> <li>• Physical (specify)</li> <li>• Psychological (specify)</li> </ul>                                                                                                                                                                                                                                                |                                                                                |             |
| <b>Type of symptoms (by history and examination, specify):</b>                                                                                                                                                                                                                                                                                           |                                                                                |             |
| <ul style="list-style-type: none"> <li>• <b>Motor disorder</b> (weakness symptoms, tremor, speech disorders and dystonia) _____</li> <li>• <b>Sensory disorder</b> _____</li> <li>• <b>Cognitive disorder</b> _____</li> <li>• <b>Gait and Balance disorder</b> _____</li> <li>• <b>Epileptic disorder</b> _____</li> <li>• <b>Pain</b> _____</li> </ul> |                                                                                |             |
| <b>Additional symptoms (based on interview, specify):</b>                                                                                                                                                                                                                                                                                                |                                                                                |             |
| <ul style="list-style-type: none"> <li>• Fatigue _____</li> <li>• Mood _____</li> <li>• Sleep _____</li> <li>• Neurovegetative _____</li> </ul>                                                                                                                                                                                                          |                                                                                |             |
| <b>Diagnostic categories:</b>                                                                                                                                                                                                                                                                                                                            |                                                                                |             |
| <ul style="list-style-type: none"> <li>• <b>FND</b> (Functional Neurological Disorder): _____</li> <li>• <b>OND</b> (Other neurological conditions): _____</li> <li>• <b>CND</b> (Comorbid FND and OND): _____</li> </ul>                                                                                                                                |                                                                                |             |
| <b>Number of consulted specialists (by directly asking patients and by reviewing all available medical records):</b>                                                                                                                                                                                                                                     |                                                                                |             |

**Number and type of investigations (by directly asking patients and by reviewing all available medical records):**

**Emergency department accesses (by directly asking patients and by reviewing all available medical records):**

**Number of prescriptions (by directly asking patients and by reviewing all available medical records):**
